# Supplementary material for: The association between experiencing homelessness in childhood or youth and adult housing stability in Housing First
Source: PubMed Central journal article supplement (PMC7938606; doi:10.1186/s12888-021-03142-0), 2021-03-08
Supplement: 12888_2021_3142_MOESM2_ESM.pdf [file 12888_2021_3142_MOESM2_ESM.pdf]

# The Association Between Experiencing Homelessness in Childhood or Youth and Adult Housing Stability in Housing First

Milad Parpouchi<sup>a</sup>, Akm Moniruzzaman<sup>a</sup>, Julian M. Somers<sup>a</sup>

<sup>a</sup> Somers Research Group, Faculty of Health Sciences, Simon Fraser University

## Screener questionnaire

- Author: At Home/Chez Soi Study National Research Team
  - Author affiliation: Department of Psychiatry, University of Toronto
- The Mini International Neuropsychiatric Interview was also included in the questionnaire [1–4]
- Please see next page for questionnaire items

## References

1. Sheehan D V, Lecrubier Y, Sheehan KH, Amorim P, Janavs J, Weiller E, et al. The Mini-International Neuropsychiatric Interview (M.I.N.I.): the development and validation of a structured diagnostic psychiatric interview for DSM-IV and ICD-10. *J Clin Psychiatry*. 1998;59 Suppl 20:22–33.
2. Amorim P, Lecrubier Y, Weiller E, Hergueta T, Sheehan D. DSM-III-R psychotic disorders: procedural validity of the Mini International Neuropsychiatric Interview (MINI). Concordance and causes for discordance with the CIDI. *Eur Psychiatry*. 1998;13:26–34.
3. Lecrubier Y, Sheehan D V., Weiller E, Amorim P, Bonora I, Sheehan KH, et al. The Mini International Neuropsychiatric Interview (MINI). A short diagnostic structured interview: reliability and validity according to the CIDI. *Eur Psychiatry*. 1997;12:224–31.
4. Sheehan D V., Lecrubier Y, Sheehan KH, Janavs J, Weiller E, Keskiner A, et al. The validity of the Mini International Neuropsychiatric Interview (MINI) according to the SCID-P and its reliability. *Eur Psychiatry*. 1997;12:232–41.

## Screener Coding Legend

| Q No. | SASCode | Answer Selection                                                                                                                                                       | SASVariableName |
|-------|---------|------------------------------------------------------------------------------------------------------------------------------------------------------------------------|-----------------|
|       |         | [8888] Subject skipped the questionnaire                                                                                                                               |                 |
|       |         | [888] Not applicable                                                                                                                                                   |                 |
|       |         | [999] No response to this question                                                                                                                                     |                 |
|       |         | [1]/[0] Inclusive selection (checkbox): [1-Yes]/[0-No]                                                                                                                 |                 |
| 1.    |         | <b>Enter the Referring Source:</b>                                                                                                                                     |                 |
|       |         | (Numeric - Length: 4)                                                                                                                                                  | SCRNQ1          |
| 2.    |         | <b>Ask them for their date of birth.</b>                                                                                                                               |                 |
|       |         | (AlphaNumeric - Length: 12)                                                                                                                                            | SCRNQ2          |
| 2.a   |         | <b>To confirm, ask them if they are 18 years of age or older (19 in BC)?</b>                                                                                           | SCRNQ2_a        |
|       |         | [1] Yes                                                                                                                                                                |                 |
|       |         | [0] No                                                                                                                                                                 |                 |
| 3.    |         | <b>Are they currently Absolutely Homeless or Precariously Housed?</b>                                                                                                  | SCRNQ3          |
|       |         | [1] Yes                                                                                                                                                                |                 |
|       |         | [0] No                                                                                                                                                                 |                 |
| 4.    |         | <b>Record Housing Status:</b>                                                                                                                                          | SCRNQ4          |
|       |         | [1] Absolutely Homeless                                                                                                                                                |                 |
|       |         | [2] Precariously Housed                                                                                                                                                |                 |
| 5.    |         | <b>Are they a client of ICM or ACT Program?</b>                                                                                                                        | SCRNQ5          |
|       |         | [1] Yes                                                                                                                                                                |                 |
|       |         | [0] No                                                                                                                                                                 |                 |
| 6.    |         | <b>Verbal expression of clearly false or bizarre ideas such as reporting references to self on TV or in newspaper or claiming to be someone he/she clearly is not.</b> | SCRNQ6          |
|       |         | [1] Yes                                                                                                                                                                |                 |
|       |         | [0] No                                                                                                                                                                 |                 |
| 7.    |         | <b>Appears to or reports hearing sounds of people talking when no one is around, or sees visions others do not see.</b>                                                | SCRNQ7          |
|       |         | [1] Yes                                                                                                                                                                |                 |
|       |         | [0] No                                                                                                                                                                 |                 |
| 8.    |         | <b>Extremely difficult to understand because odd use of words, rambling, and/or sudden change of topics.</b>                                                           | SCRNQ8          |
|       |         | [1] Yes                                                                                                                                                                |                 |
|       |         | [0] No                                                                                                                                                                 |                 |

9. **Indications of extreme sadness together with severe apathy or withdrawal.** SCRNQ9  
    [1] Yes  
    [0] No
10. **Engages in self harm activities such as slashing and/or frequent overdosing.** SCRNQ10  
    [1] Yes  
    [0] No
11. **Has written documentation of diagnosed non-substance-related mental disorder or written documentation of a psychiatric inpatient admission that meets the threshold for illness. Record diagnosis (es):** SCRNQ11  
    [1] Yes  
    [0] No
- 11.a **Current Major Depressive Episode** SCRNQ11\_a  
    [1] Yes  
    [2] No
- 11.b **Current Manic Episode or Hypomanic Episode** SCRNQ11\_b  
    [1] Yes  
    [2] No
- 11.c **Current PTSD** SCRNQ11\_c  
    [1] Yes  
    [2] No
- 11.d **Current Panic Disorder** SCRNQ11\_d  
    [1] Yes  
    [2] No
- 11.e **Current Mood Disorder with Psychotic Features** SCRNQ11\_e  
    [1] Yes  
    [2] No
- 11.f **Current Psychotic Disorder** SCRNQ11\_f  
    [1] Yes  
    [2] No
- 11.g **OTHER, specify:** SCRNQ11\_g  
    (AlphaNumeric - Length: 90)
12. **Needs assistance to meet nutritional needs (e.g., unable to obtain/access meals even when opportunity is available).** SCRNQ12  
    [1] Yes

[0] No

13. **Needs assistance to maintain minimally adequate personal hygiene, (e.g., washing, grooming, oral hygiene).** SCRQ13

[1] Yes

[0] No

14. **Needs assistance or is unwilling to access needed resources (e.g., financial benefits, clothes, appropriate accommodation or medical care).** SCRQ14

[1] Yes

[0] No

15. **Needs assistance to acquire and maintain network of family, friends and peers (e.g., extremely isolated).** SCRQ15

[1] Yes

[0] No

16. **Needs assistance to manage finances (e.g., unable to budget for basic daily living needs).** SCRQ16

[1] Yes

[0] No

17. **Current Major Depressive Episode** SCRQ17

[1] Yes

[0] No

18. **Current Manic Episode or Hypomanic Episode** SCRQ18

[1] Yes

[0] No

19. **Current PTSD** SCRQ19

[1] Yes

[0] No

20. **Current Panic Disorder** SCRQ20

[1] Yes

[0] No

21. **Current Mood Disorder with Psychotic Features** SCRQ21

[1] Yes

[0] No

22. **Current Psychotic Disorder** SCRQ22

[1] Yes

[0] No

23. **Current Alcohol Dependence** SCRNQ23  
[1] Yes  
[0] No
24. **Current Substance Dependence** SCRNQ24  
[1] Yes  
[0] No
25. **Current Alcohol Abuse** SCRNQ25  
[1] Yes  
[0] No
26. **Current Substance Abuse** SCRNQ26  
[1] Yes  
[0] No
27. **Current Suicidality** SCRNQ27  
[1] Low  
[2] Moderate  
[3] High  
[4] No
28. **Were you in a special class in school?** SCRNQ28  
[1] Yes  
[0] No  
[9] Don't know
29. **Did you ever get extra help with learning in school?** SCRNQ29  
[1] Yes  
[0] No  
[9] Don't know
30. **Do you think you have or do you feel you have a learning problem or learning disability?** SCRNQ30  
[1] Yes  
[0] No  
[9] Don't know
31. **Did anyone ever tell you that you have a learning problem or learning disability?** SCRNQ31  
[1] Yes  
[0] No  
[9] Don't know
