# Supplementary material for: The association between experiencing homelessness in childhood or youth and adult housing stability in Housing First
Source: Springer Nature journal article supplement (doi:10.1186/s12888-021-03142-0), 2021-03-08
Supplement: MOESM1 [file 18940934]

# The Association Between Experiencing Homelessness in Childhood or Youth and Adult Housing Stability in Housing First

Milad Parpouchi<sup>a</sup>, Akm Moniruzzaman<sup>a</sup>, Julian M. Somers<sup>a</sup>

<sup>a</sup> Somers Research Group, Faculty of Health Sciences, Simon Fraser University

## **Demographics, Service & Housing History questionnaire**

- Author: At Home/Chez Soi Study National Research Team
  - Author affiliation: Department of Psychiatry, University of Toronto
- Demographic items of this questionnaire were adapted from multiple sources [1-3]
- Please see next page for questionnaire items

## **References**

1. Goering P. Making a difference: Ontario's Community Mental Health Evaluation Initiative. Toronto; 2004.
2. Toronto Board of Education, Organizational Development Department, Research and Information Services. Research report: 2006 student census, Grades 7-12 – system overview. Toronto: Toronto Board of Education; 2007.
3. Statistics Canada. Census 2006. Long form. Ottawa; 2006.

## Demographics, Service & Housing History Coding Legend

| Q No. | SASCode | Answer Selection                                   | SASVariableName |
|-------|---------|----------------------------------------------------|-----------------|
|       | [8888]  | Subject skipped the questionnaire                  |                 |
|       | [888]   | Not applicable                                     |                 |
|       | [999]   | No response to this question                       |                 |
|       | [1]/[0] | Inclusive selection (checkbox): [1-Yes]/[0-No]     |                 |
| 1.    |         | <b>What is your gender? Do you identify as:</b>    | DSHHQ1          |
|       | [1]     | Male                                               |                 |
|       | [2]     | Female                                             |                 |
|       | [3]     | Transgender                                        |                 |
|       | [4]     | Transexual                                         |                 |
|       | [5]     | Other                                              |                 |
|       | [98]    | Declined                                           |                 |
| 2.    |         | <b>Where were you born, that is, what country?</b> | DSHHQ2          |
|       | [1]     | Albania                                            |                 |
|       | [2]     | Afghanistan                                        |                 |
|       | [3]     | Bangladesh                                         |                 |
|       | [4]     | Canada                                             |                 |
|       | [5]     | China                                              |                 |
|       | [6]     | Guyana                                             |                 |
|       | [7]     | Hong Kong                                          |                 |
|       | [8]     | India                                              |                 |
|       | [9]     | Iran                                               |                 |
|       | [10]    | Jamaica                                            |                 |
|       | [11]    | Pakistan                                           |                 |
|       | [12]    | Philippines                                        |                 |
|       | [13]    | Romania                                            |                 |
|       | [14]    | Russia                                             |                 |
|       | [15]    | Somalia                                            |                 |
|       | [16]    | South Korea                                        |                 |
|       | [17]    | Sri Lanka                                          |                 |
|       | [18]    | Ukraine                                            |                 |
|       | [19]    | United States                                      |                 |
|       | [20]    | Vietnam                                            |                 |
|       | [21]    | Yugoslavia                                         |                 |
|       | [22]    | Other (specify)                                    |                 |
|       | [23]    | Don't know                                         |                 |
|       | [98]    | Declined                                           |                 |

|                                                                                                                                           |          |
|-------------------------------------------------------------------------------------------------------------------------------------------|----------|
| 2.a <b>If other (specify):</b>                                                                                                            |          |
| (AlphaNumeric - Length: 60)                                                                                                               | DSHHQ2_a |
| 2.b <b>Within Canada, what is your original home community, that is, where did you live after you were born and for your early years?</b> |          |
| (AlphaNumeric - Length: 255)                                                                                                              | DSHHQ2_b |
| 2.c <b>When did you arrive in Canada?</b>                                                                                                 |          |
| (AlphaNumeric - Length: 12)                                                                                                               | DSHHQ2_c |
| 2.d <b>When you arrived in Canada, what was your status?</b>                                                                              | DSHHQ2_d |
| [5] Landed immigrant                                                                                                                      |          |
| [1] Visitor with intent to apply                                                                                                          |          |
| [2] Student                                                                                                                               |          |
| [3] Temporary status (work permit, domestic help)                                                                                         |          |
| [4] Refugee Claimant (awaiting hearing)                                                                                                   |          |
| [6] Other                                                                                                                                 |          |
| [9] Don't know                                                                                                                            |          |
| [98] Declined                                                                                                                             |          |
| 3. <b>Where were your parents born, that is, what countries?</b>                                                                          |          |
| [1]/[0] Albania                                                                                                                           | DSHHQ3a  |
| [1]/[0] Afghanistan                                                                                                                       | DSHHQ3b  |
| [1]/[0] Bangladesh                                                                                                                        | DSHHQ3c  |
| [1]/[0] Canada                                                                                                                            | DSHHQ3d  |
| [1]/[0] China                                                                                                                             | DSHHQ3e  |
| [1]/[0] Guyana                                                                                                                            | DSHHQ3f  |
| [1]/[0] Hong Kong                                                                                                                         | DSHHQ3g  |
| [1]/[0] India                                                                                                                             | DSHHQ3h  |
| [1]/[0] Iran                                                                                                                              | DSHHQ3i  |
| [1]/[0] Jamaica                                                                                                                           | DSHHQ3j  |
| [1]/[0] Pakistan                                                                                                                          | DSHHQ3k  |
| [1]/[0] Philippines                                                                                                                       | DSHHQ3l  |
| [1]/[0] Romania                                                                                                                           | DSHHQ3m  |
| [1]/[0] Russia                                                                                                                            | DSHHQ3n  |
| [1]/[0] Somalia                                                                                                                           | DSHHQ3o  |
| [1]/[0] South Korea                                                                                                                       | DSHHQ3p  |
| [1]/[0] Sri Lanka                                                                                                                         | DSHHQ3q  |
| [1]/[0] Ukraine                                                                                                                           | DSHHQ3r  |
| [1]/[0] United States                                                                                                                     | DSHHQ3s  |
| [1]/[0] Vietnam                                                                                                                           | DSHHQ3t  |
| [1]/[0] Yugoslavia                                                                                                                        | DSHHQ3u  |

[1]/[0] Other

DSHHQ3v

[1]/[0] Don't know

DSHHQ3w

[1]/[0] Declined

DSHHQ3x

3.a **Other specify:**

(AlphaNumeric - Length: 45)

DSHHQ3\_a

4. **What is the language you first learned to speak at home in childhood and still understand?**

DSHHQ4

[1] Albanian

[2] Arabic

[3] Bengali

[4] Cantonese

[5] Mandarin

[6] Dari

[7] English

[8] French

[9] Greek

[10] Gujarati

[11] Hindi

[12] Korean

[13] Ojibway

[14] Persian (Farsi)

[15] Portuguese

[16] Punjabi

[17] Russian

[18] Serbian

[19] Somali

[20] Spanish

[21] Tagalog

[22] Tamil

[23] Urdu

[24] Vietnamese

[25] Other (specify)

[26] Don't know

[98] Declined

4.a **If other (specify):**

(AlphaNumeric - Length: 30)

DSHHQ4\_a

5. **What is your ethnic or cultural identity?**

DSHHQ5

[1] Aboriginal (Skip to 5d)

- [2] Asian - East\* (e.g. China, Japan, Korea)
- [3] Asian - South\* (e.g. India, Pakistan, Sri Lanka)
- [4] Asian - South East\* (e.g. Malaysia, Philippines, Vietnam)
- [5] Black - Africa\* (e.g. Ghana, Kenya, Somalia)
- [6] Black - Canada\*
- [7] Black - Caribbean Region\* (e.g. Jamaica, Trinidad, Tobago)
- [8] Latin American\* (e.g. Argentina, Chile, Costa Rica)
- [9] Indian-Caribbean\* (i.e. Guyana with origins in India)
- [10] Middle Eastern\* (e.g. Egypt, Iran, Israel, Palestine)
- [11] White - Canada
- [12] White - Europe (e.g. England, Greece, Italy, Portugal, Serbia)
- [13] Mixed Background - with at least 1 of groups marked with an asterisk(\*) (specify)
- [14] Mixed Background - without any of the groups marked with an asterisk(\*) (specify)
- [15] Other (specify)

5.a **If other (specify):**

(AlphaNumeric - Length: 60)

DSHHQ5\_a

5.b **If mixed (specify):**

(AlphaNumeric - Length: 60)

DSHHQ5\_b

5.c **If mixed (specify):**

(AlphaNumeric - Length: 60)

DSHHQ5\_c

5.d **If Aboriginal, are you (check all that apply):**

[1]/[0] Inuit

DSHHQ5\_da

[2]/[0] Metis

DSHHQ5\_db

[3]/[0] First Nations Status

DSHHQ5\_dc

[4]/[0] First Nations Non-status

DSHHQ5\_dd

[5]/[0] Indigenous from outside Canada

DSHHQ5\_de

[6]/[0] Other (specify)

DSHHQ5\_df

5.d1 **If other (specify):**

(AlphaNumeric - Length: 60)

DSHHQ5\_d1

6. **So just to confirm, how would you describe your ethnic or cultural background in your own words?**

(AlphaNumeric - Length: 300)

DSHHQ6

7. **Do you identify yourself as Canadian? (You do not have to be born in Canada to think of yourself as Canadian).**

DSHHQ7

[1] Yes

[0] No

[9] Don't know

[98] Declined

8. **Not counting kindergarten, how many years of school did you complete?**

(Numeric - Length: 2)

DSHHQ8

9. **What is your level of education?**

DSHHQ9

[1] Completed grade 4 or less

[2] Completed grade 5 to 8

[3] Attended High School, not completed

[4] Completed High School

[5] Attended business, trade, technical school (incl. CEGEP)

[7] Completed business, trade, technical school (incl. CEGEP)

[6] Attended University, not completed

[8] Completed University (Bachelor's degree)

[9] Attended Graduate School, not completed

[10] Completed Graduate School

[11] Don't know

[98] Declined

10. **Are you currently single... (read first 6 options):**

DSHHQ10

[1] Single, never married

[2] Married

[3] Separated

[4] Divorced

[5] Cohabiting with a partner

[6] Widowed

[9] Don't know

[98] Declined

11. **How many children do you have under the age of 18 (19 in Vancouver)? (Include whether or not they live with you).**

DSHHQ11

[0] 0

[1] 1

[2] 2

[3] 3

[4] 4

[5] >4

[9] Don't know

[98] Declined

- 11.a **How many of these children do you currently provide full or partial support to?**  
 (Numeric - Length: 2) DSHHQ11\_a
- 11.b **What is your relationship to your child or children?**
- [1]/[0] Biological parent DSHHQ11\_ba
  - [1]/[0] Parent's partner (living together) DSHHQ11\_bb
  - [1]/[0] Adoptive parent DSHHQ11\_bc
  - [1]/[0] Foster parent DSHHQ11\_bd
  - [1]/[0] Stepparent DSHHQ11\_be
  - [1]/[0] Other adult relative (specify) DSHHQ11\_bf
  - [1]/[0] Don't know DSHHQ11\_bg
  - [1]/[0] Declined DSHHQ11\_bh
- 11.c **If other adult relative (specify):**  
 (AlphaNumeric - Length: 60) DSHHQ11\_c
12. **Have you worked continuously for at least one year in the past?** DSHHQ12
- [1] Yes
  - [0] No
  - [9] Don't know
  - [98] Declined
13. **Have you ever had any wartime service in the military forces of Canada or its allies?** DSHHQ13
- [1] Yes
  - [0] No
  - [9] Don't know
  - [98] Declined
14. **What is your current PRIMARY employment status?** DSHHQ14
- [1] Unemployed
  - [2] Employed (including self-employed)
  - [3] Volunteer work, unpaid
  - [4] Employed in a special work program
  - [5] Retired
  - [6] Student
  - [7] Housewife/husband
  - [8] Other (specify)
  - [9] Don't know
  - [98] Declined
- 14.a **If other (specify):**  
 (AlphaNumeric - Length: 60) DSHHQ14\_a

|      |                                                                        |           |
|------|------------------------------------------------------------------------|-----------|
| 14.b | <b>What is the main reason you are not working?</b>                    | DSHHQ14_b |
|      | [1] Mental illness                                                     |           |
|      | [2] Physical illness                                                   |           |
|      | [3] Transportation problems                                            |           |
|      | [4] Fear of loss of benefits                                           |           |
|      | [5] Both mental and physical illness                                   |           |
|      | [6] Other (specify)                                                    |           |
| 14.c | <b>If other (specify):</b>                                             |           |
|      | (AlphaNumeric - Length: 60)                                            | DSHHQ14_c |
| 14.d | <b>Would you like to have a paid job in the community?</b>             | DSHHQ14_d |
|      | [1] Yes                                                                |           |
|      | [0] No                                                                 |           |
|      | [9] Don't know                                                         |           |
|      | [98] Declined                                                          |           |
| 14.e | <b>What kind of job or jobs?</b>                                       |           |
|      | (AlphaNumeric - Length: 90)                                            | DSHHQ14_e |
| 14.f | <b>How many hours per week?</b>                                        |           |
|      | (Numeric - Length: 3)                                                  | DSHHQ14_f |
| 14.g | <b>Wage per hour?</b>                                                  |           |
|      | (Numeric - Length: 6)                                                  | DSHHQ14_g |
| 14.h | <b>Where are you studying?</b>                                         |           |
|      | (AlphaNumeric - Length: 30)                                            | DSHHQ14_h |
| 14.i | <b>How many credits per semester are you currently registered for?</b> |           |
|      | (Numeric - Length: 3)                                                  | DSHHQ14_i |
| 14.j | <b>How many hours per week are you currently registered for?</b>       |           |
|      | (Numeric - Length: 2)                                                  | DSHHQ14_j |
| 15.  | <b>What are your current sources of income?</b>                        |           |
|      | [1]/[0] Earnings from regular work                                     | DSHHQ15a  |
|      | [1]/[0] Longterm Disability (Private Insurer)                          | DSHHQ15b  |
|      | [1]/[0] Earnings from casual work                                      | DSHHQ15c  |
|      | [1]/[0] Personal Needs Allowance (PNA (Ont.))                          | DSHHQ15d  |
|      | [1]/[0] Unemployment insurance (EI or EIA in Man.)                     | DSHHQ15e  |
|      | [1]/[0] Selling papers, souvenirs, crafts                              | DSHHQ15f  |
|      | [1]/[0] Disability income (ODSP/ CPPD (Ont.) IAPD (Man.))              | DSHHQ15g  |
|      | [1]/[0] Pan-handling                                                   | DSHHQ15h  |



- [1]/[0] Welfare/income assistance (OW (Ont.) w/PWD or PPMB status (BC)) DSHHQ15i
- [1]/[0] Busking (entertaining for cash) DSHHQ15j
- [1]/[0] Pension, incl. old age security, CPP, veteran's pension DSHHQ15k
- [1]/[0] Squeegeeing DSHHQ15l
- [1]/[0] Other (specify) DSHHQ15m
- [1]/[0] Collecting/recycling (bottles, scrap metal etc.) DSHHQ15n

15.a **Other (specify):**

(AlphaNumeric - Length: 100) DSHHQ15\_a

16. **In the study, we recognize that there may be other sources of income that you may have used to survive on the street. Please know that your confidentiality is protected if you would like to tell me about these sources of income, but like the other questions you do not have to tell me about them.**

(AlphaNumeric - Length: 200) DSHHQ16

17. **What was your total income, last month?**

(AlphaNumeric - Length: 10) DSHHQ17

18. **Do you have a provincial health card number?**

DSHHQ18

- [0] No
- [1] Yes, in possession (write down, record in profile at end of interview, and destroy paper)
- [2] Yes, but not here (ask 18.a)
- [9] Don't know
- [98] Declined

18.a **Is there a doctor's office, hospital, shelter or housing office that you've been to recently that we would be able to get your health card number from?**

(AlphaNumeric - Length: 100) DSHHQ18\_a

19. **In the past 5 years, have you been hospitalized for a mental illness at any time for longer than 6 months?**

DSHHQ19

- [1] Yes
- [0] No
- [9] Don't know
- [98] Declined

20. **In the past 5 years, have you been hospitalized 2 or more times in any one year period for a mental illness?**

DSHHQ20

- [1] Yes
- [0] No
- [9] Don't know
- [98] Declined

21. **Have you ever received treatment, counseling or harm reduction services for your use of alcohol or any drug, not counting cigarettes?** DSHHQ21
- [1] Yes
  - [0] No
  - [9] Don't know
  - [98] Declined
22. **In the past 6 months, have you been arrested for criminal activity more than once, or been imprisoned at least once, or served probation or other community sanction?** DSHHQ22
- [1] Yes
  - [0] No
  - [9] Don't know
  - [98] Declined
23. **In the past 6 months, did you spend one or more nights in a hospital, detox centre, jail or shelter?** DSHHQ23
- [1] Yes
  - [0] No
  - [9] Don't know
  - [98] Declined
- 23.a **For the most recent stay, what is the name of the hospital, detox centre, jail or shelter?** DSHHQ23\_a
- (AlphaNumeric - Length: 10)
- 23.b **Approximately how many days were you in [location name]?** DSHHQ23\_b
- (Numeric - Length: 3)
- 23.c **For the stay before that, what is the name of the hospital, detox centre, jail or shelter?** DSHHQ23\_c
- (AlphaNumeric - Length: 10)
- 23.d **Approximately how many days were you in [location name]?** DSHHQ23\_d
- (Numeric - Length: 3)
- 23.e **And for the stay before that, what is the name of the hospital, detox centre, jail or shelter?** DSHHQ23\_e
- (AlphaNumeric - Length: 10)
- 23.f **Approximately how many days were you in [location name]?** DSHHQ23\_f
- (Numeric - Length: 3)
24. **When did you first become homeless (year)?** DSHHQ24
- (Numeric - Length: 4)

25. **In your lifetime, what is the total amount of time you have been homeless (months)?**

(Numeric - Length: 3)

DSHHQ25

26. **How long was your longest single period of homelessness (months)?**

(Numeric - Length: 3)

DSHHQ26

27. **When did your last period of homelessness end?**

(AlphaNumeric - Length: 12)

DSHHQ27
